# Supplementary material for: Exploiting endogenous fibrocartilage stem cells to regenerate cartilage and repair joint injury
Source: PubMed Central journal article supplement (PMC5062541; doi:10.1038/ncomms13073), 2016-10-10
Supplement: ncomms13073-s1.pdf [file ncomms13073-s1.pdf]

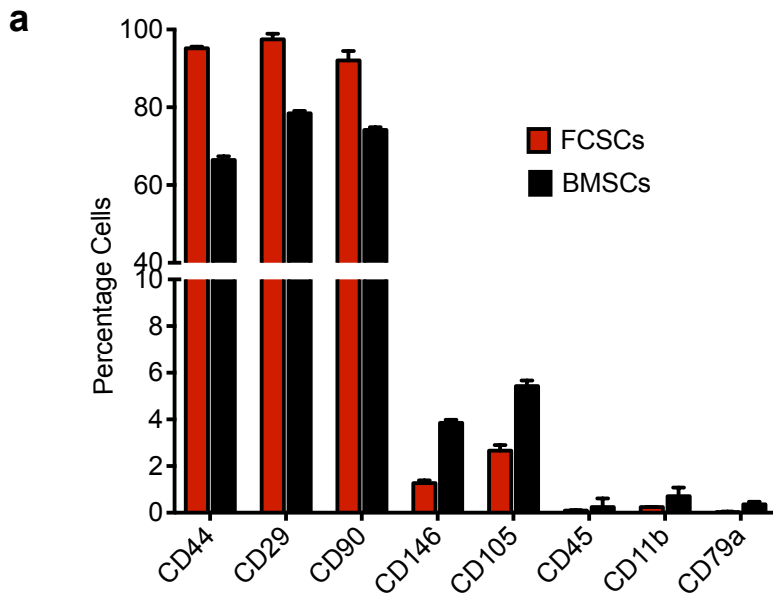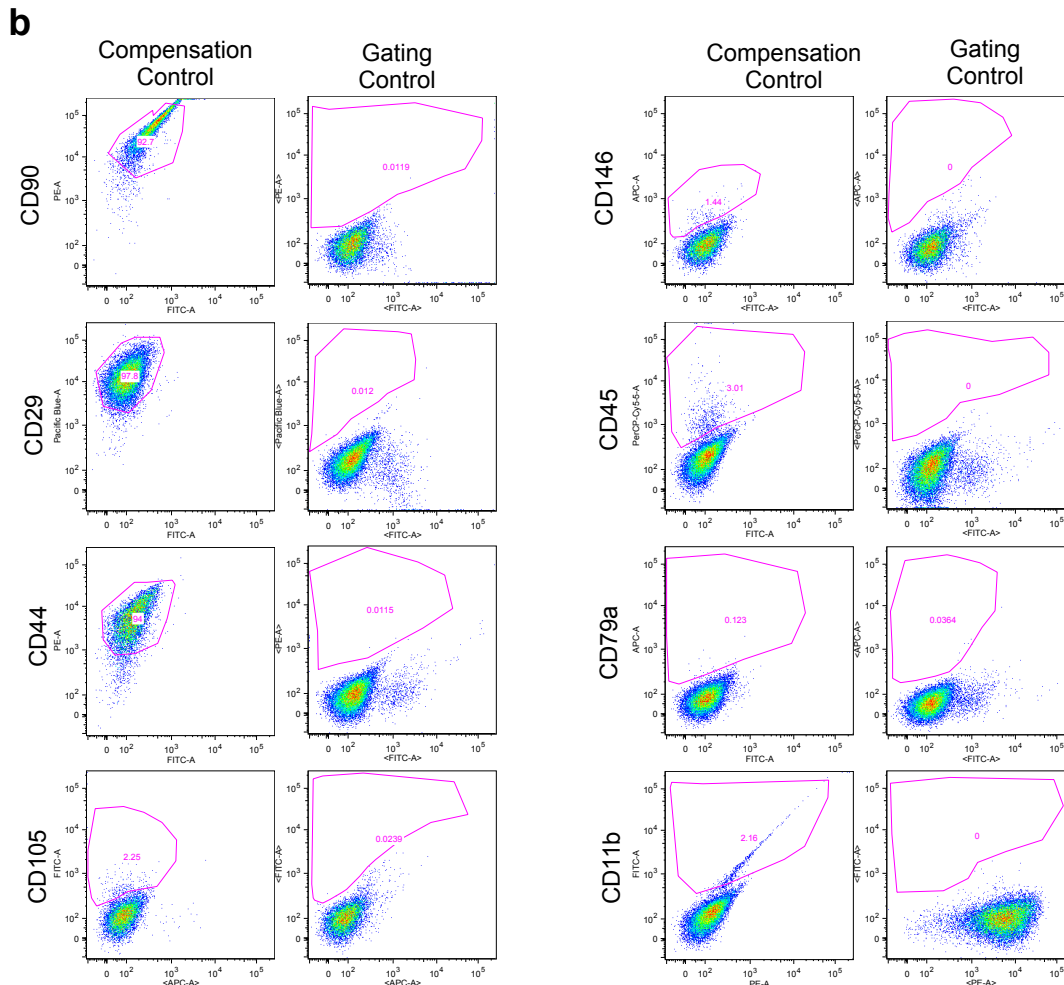

**Supplementary Figure 1: FCSCs cell surface markers**

**(a)** Flow cytometric analysis of FCSCs and donor-matched BMSCs. Data are mean  $\pm$ S.D.; n=4 experiments. **(b)** Representative gating strategy for FCSCs. To determine positive cells compensation control including single fluorochrome and gating control excluding single fluorochrome were used.

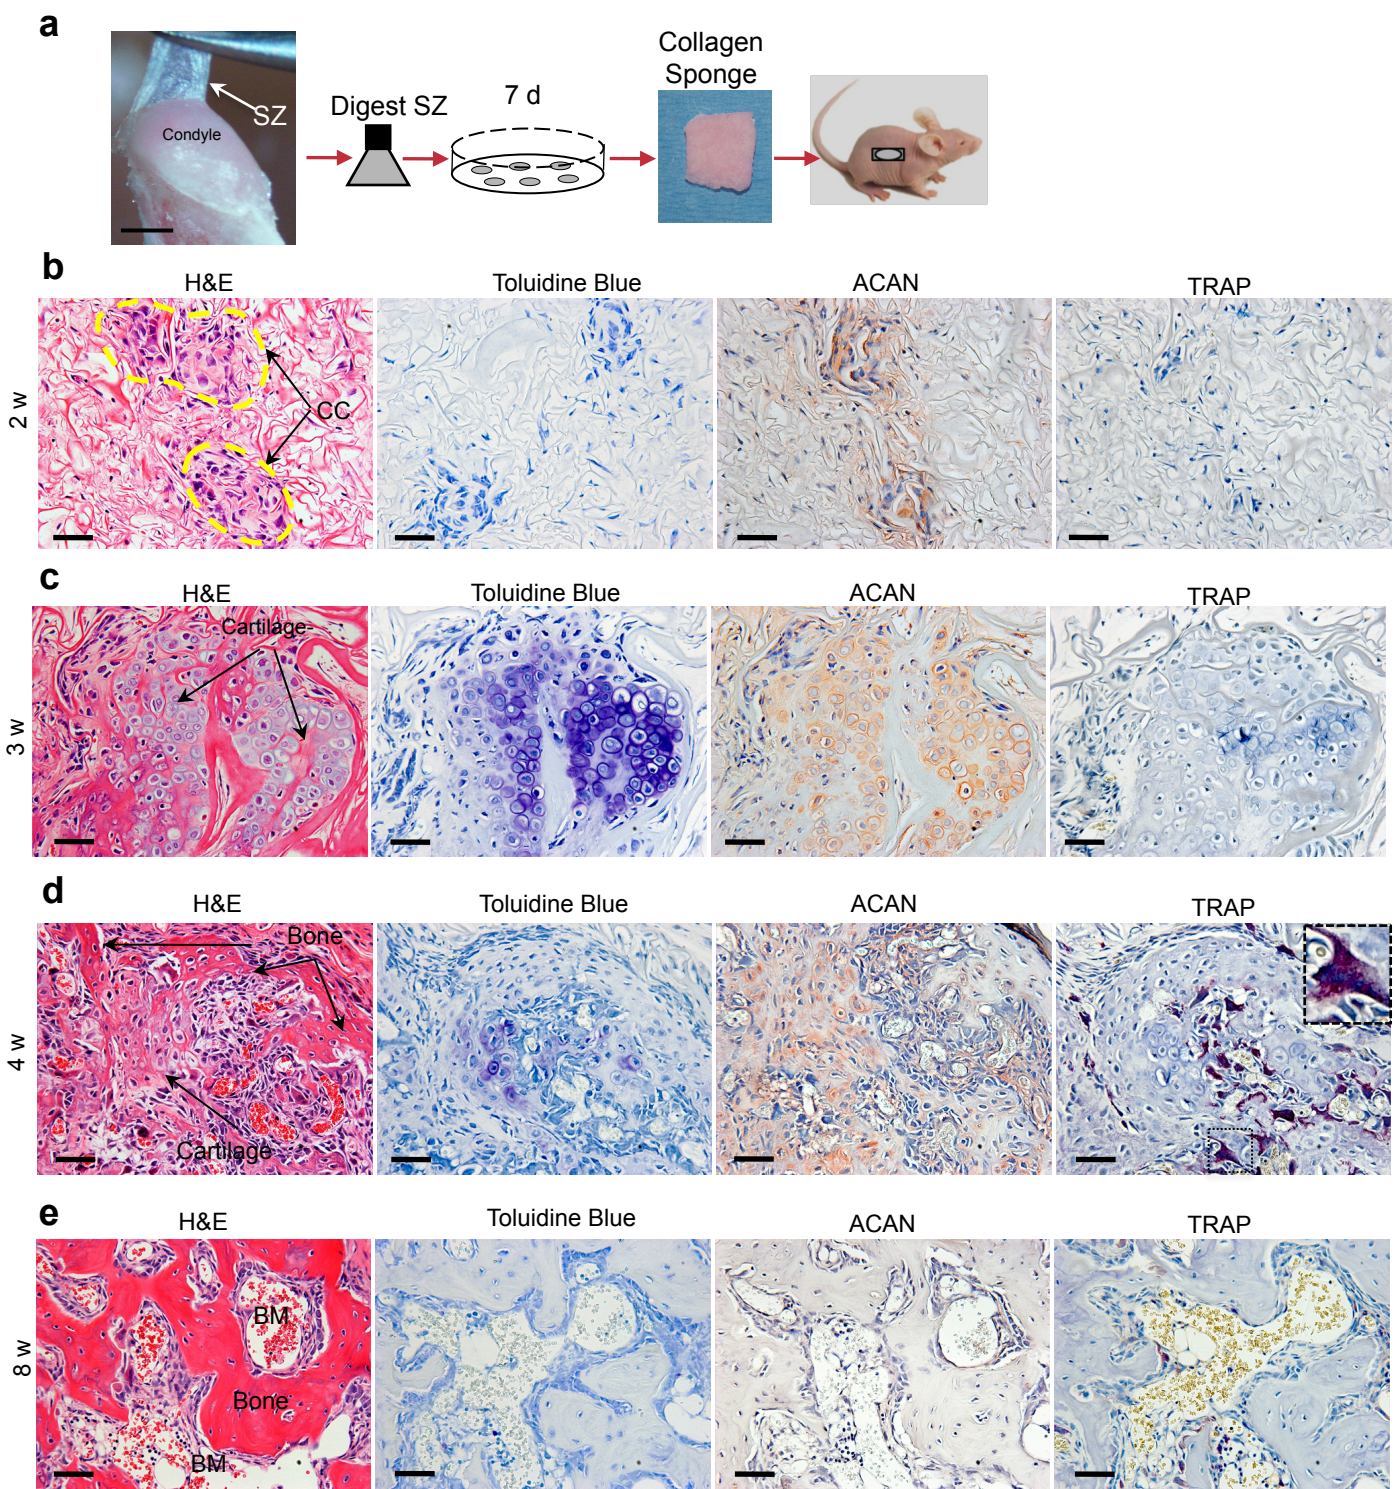

**Supplementary Figure 2: FCSCs recapitulate endochondral ossification *in vivo***

(a) Schematic demonstrating FCSC transplantation experiment. Scale bar = 2mm. (b-e) Time course of representative histological sections of regenerated tissue after 2 (4/6 transplants), 3 (5/6 transplants), 4 (5/6 transplants) and 8 (7/8 transplants) weeks *in vivo*. Serial sections showing hemotoxylin and eosin (H&E) stain, toluidine blue stain, aggrecan immunohistochemistry (ACAN) and tartrate-resistant acid phosphatase (TRAP) staining. BM=bone marrow. CC=cell condensation. Sections are representative images. Scale bar= 50 μm.

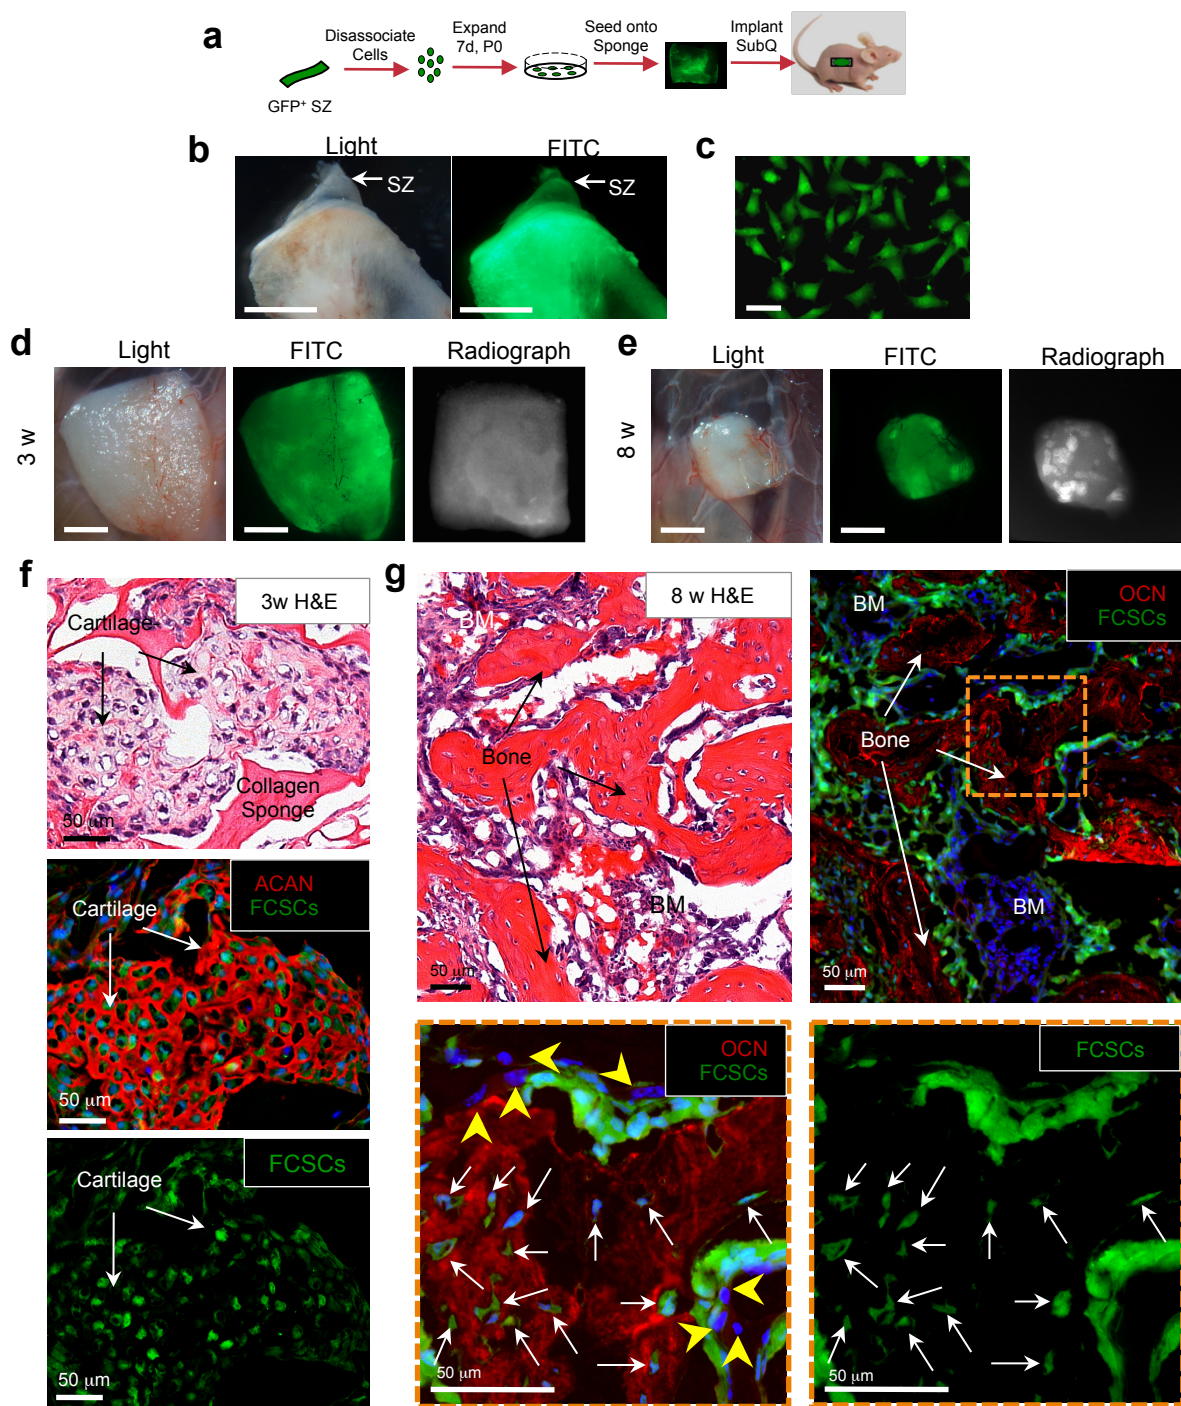

**Supplementary Figure 3: GFP<sup>+</sup> FCSCs spontaneously form cartilage and bone**

(a) Schematic of GFP<sup>+</sup> FCSC transplantation experiment. (b) GFP<sup>+</sup> rat superficial zone tissue (SZ) dissection shown in light and fluorescent microscopy. Scale bar=4 mm. (c) GFP<sup>+</sup> FCSCs shown at 5 days. Scale bar=50 μm. (d,e) GFP<sup>+</sup> FCSC collagen sponge transplants on dorsum of nude mice after 3 and 8 weeks in vivo, respectively. Scale bar=3mm. (f) Representative hematoxylin and eosin staining of GFP FCSC transplant after 3 weeks. Serial section showing GFP<sup>+</sup> FCSCs under fluorescent light (green) and immunohistochemistry for aggrecan (acan, red). Dapi blue staining=nuclei. Scale bar=50 μm. (g) Representative hematoxylin and eosin staining of GFP FCSC transplant after 8 weeks. Serial section showing GFP<sup>+</sup> FCSC under fluorescent light (green) and immunohistochemistry for osteocalcin (OCN, red). Dapi blue staining=nuclei. Scale bar=50 μm.

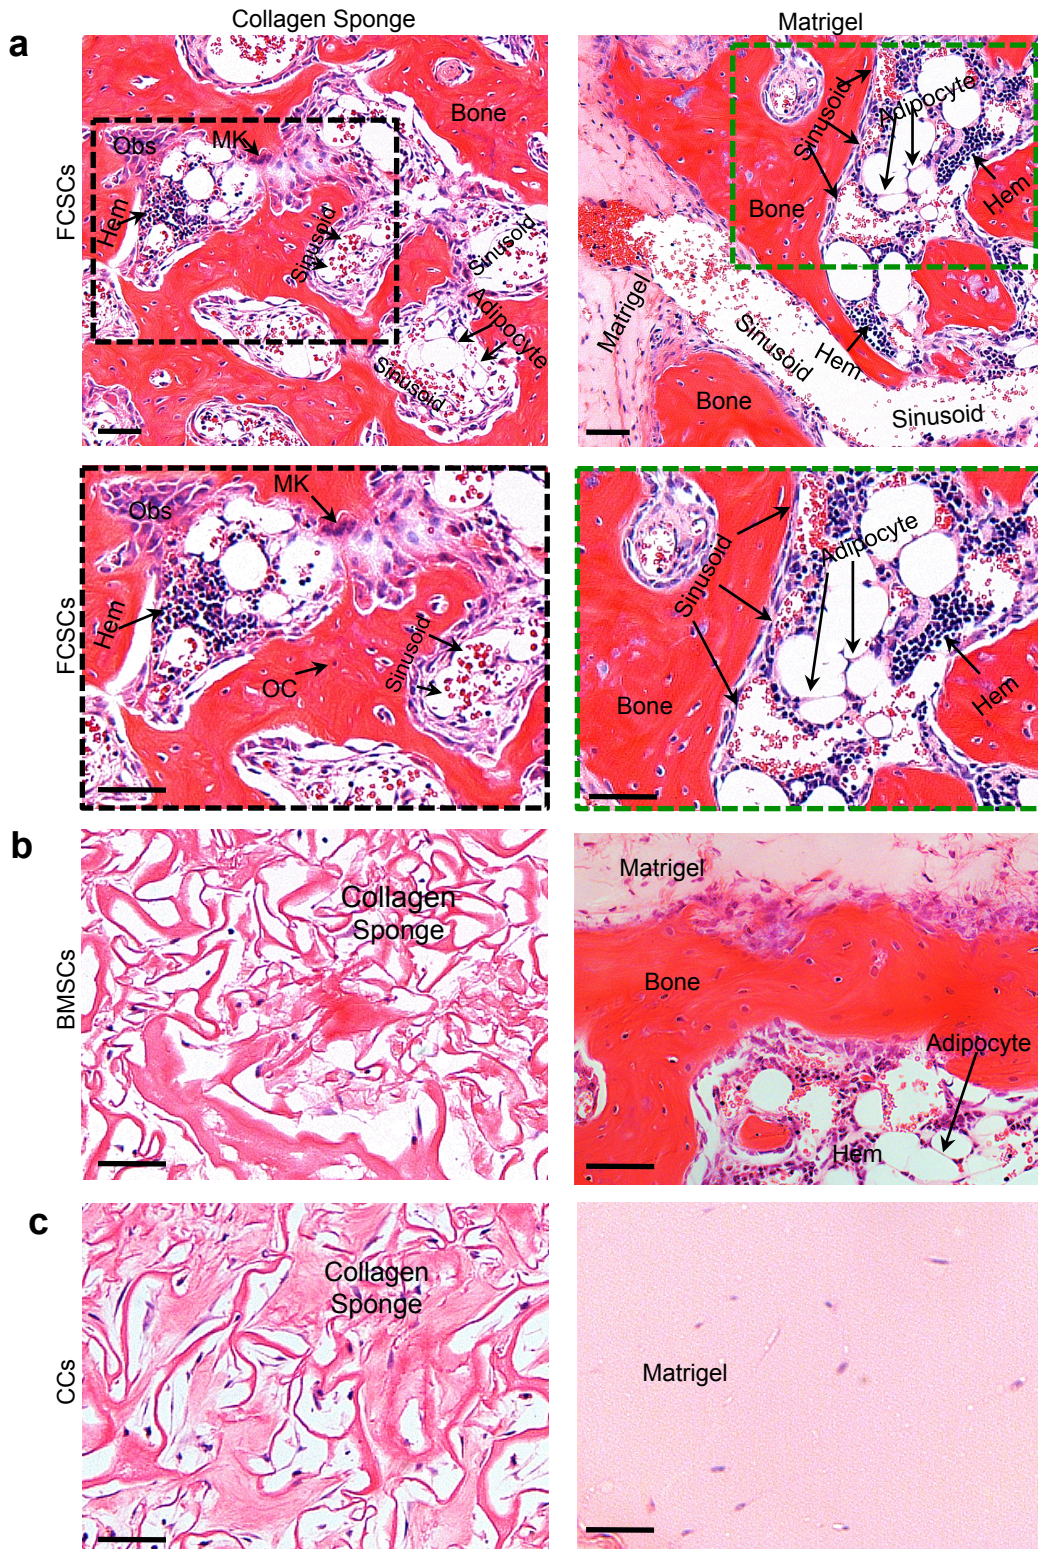

**Supplementary Figure 4: FCSCs spontaneously generate organized bone**

H&E staining of transplants show FCSCs generate bone with a hematopoietic microenvironment in multiple carriers after 8 weeks, but donor-matched condyle cells are unable to generate bone. Donor-matched FCSCs, bone marrow stromal cells (BMSCs), and condyle cells (CCs) were seeded onto (a) collagen sponge, (b) Matrigel or (c) gelfoam and transplanted on the dorsum on 8 week-old male nude mouse for 8 weeks. FCSCs form bone with mature osteocytes (OC) with an organized hematopoietic microenvironment including sinusoids, hematopoietic cell clusters (Hem), adipocytes, and osteoblasts (Obs). Scale bar = 50  $\mu$ m.

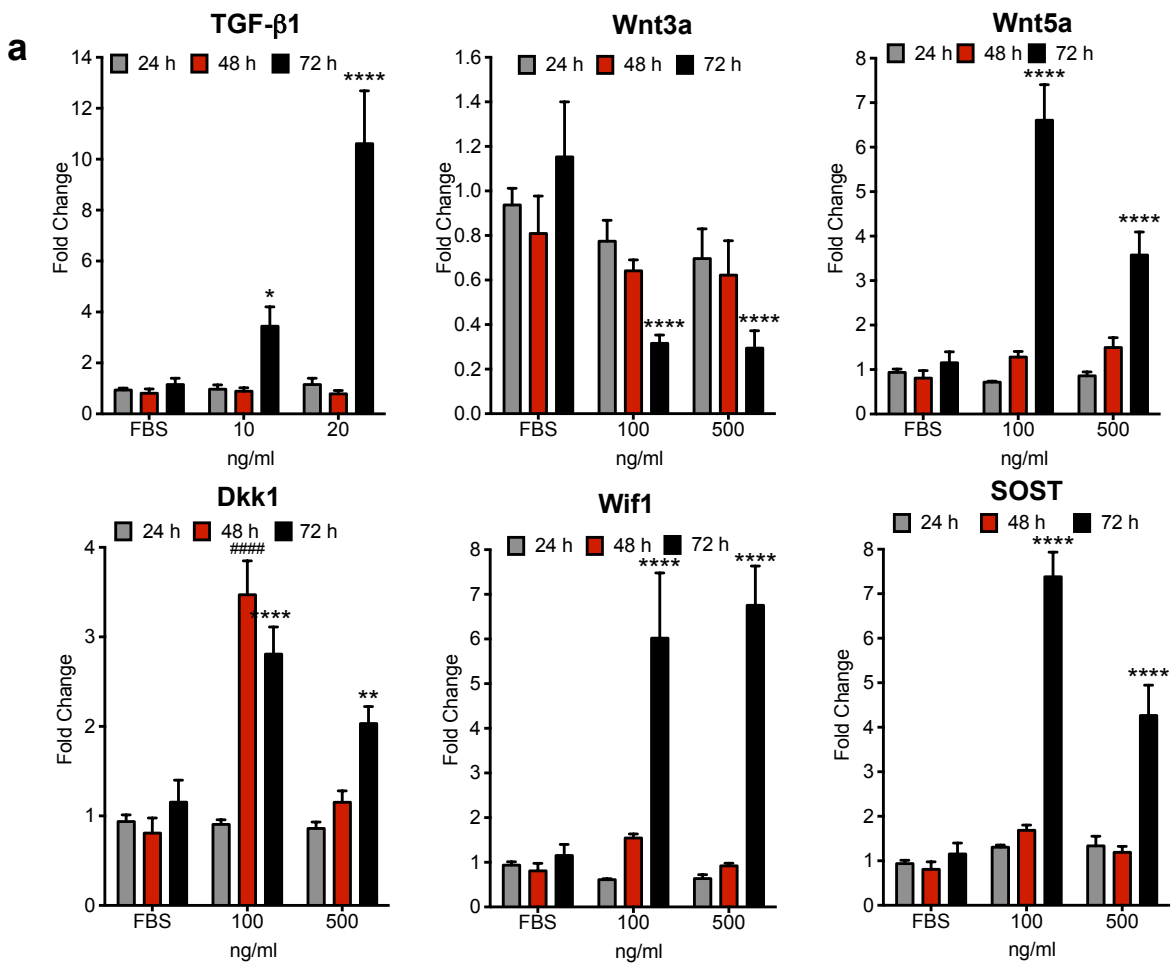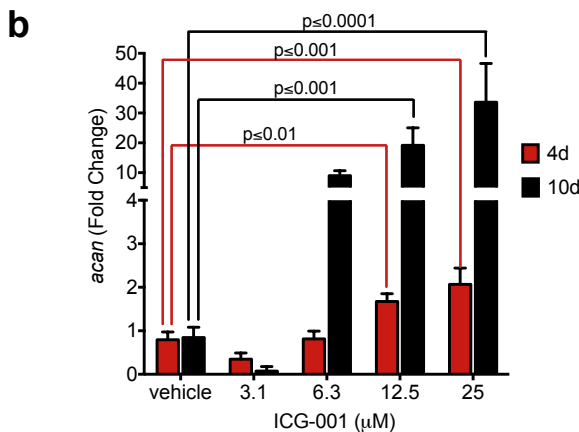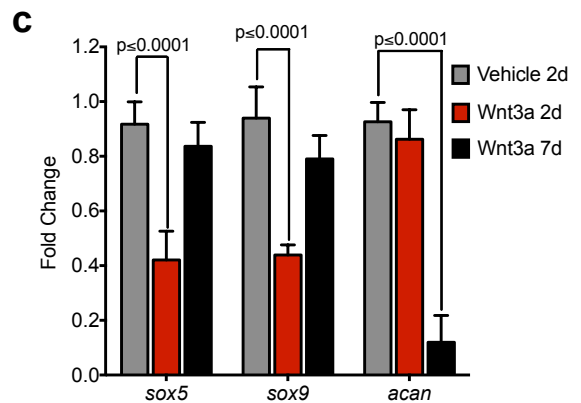

**Supplementary Figure 5: FCSCs to differentiate into chondrocytes through inhibited Wnt**

(a) FCSCs were treated with TGF- $\beta$ 1, Wnt3a, Wnt5a and canonical Wnt inhibitors (Dkk1, Wif1, SOST). qRT-PCR was used to determine aggrecan expression in FCSCs after 24h, 48h and 72h. Data are mean fold changed normalized to GAPDH and relative to FBS or vehicle control  $\pm$  S.D.; n=3 independent experiments; two-way ANOVA followed by Tukey's post hoc test. (b) qRT-PCR of aggrecan (*acan*) expression in FCSCs with ICG-001 after 4d and 10d. Data are normalized to GAPDH and mean fold change relative to FBS/vehicle control  $\pm$  SD; n=3 independent experiments; one-way ANOVA followed by Tukey's post hoc test. (c) qRT-PCR was used to *sox5*, *sox9* and *acan* expression in FCSCs treated with Wnt3a after 2d and 7d. Data are normalized to GAPDH and mean fold change relative to FBS/vehicle control 2 days  $\pm$  S.D.; n=5 independent experiments; one-way ANOVA followed by Tukey's post hoc test.

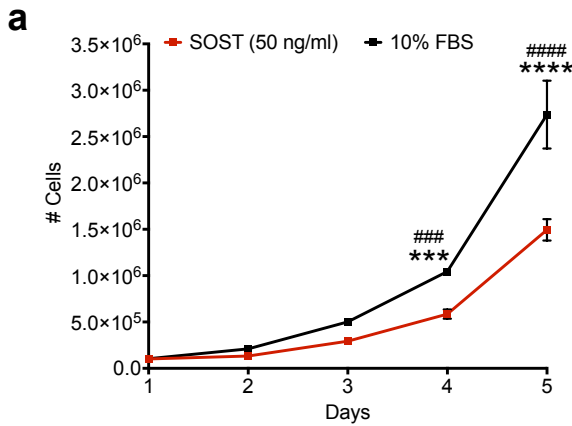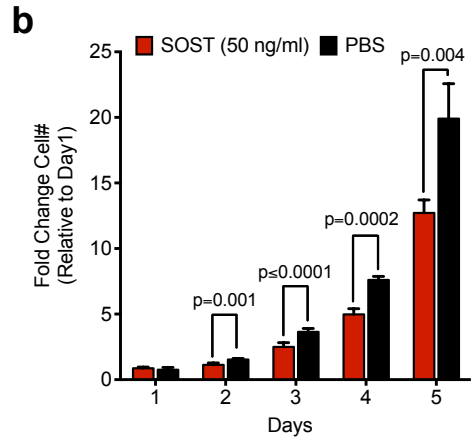

**Supplementary Figure 6: Sclerostin inhibits FCSC proliferation**

(a) Cell growth curve of FCSCs with SOST or vehicle over 5 days. Data are mean  $\pm$  S.D.; n=6 independent experiments; \*\*\* $p \leq 0.001$  SOST 4d vs vehicle 4d; ### $p \leq 0.001$  SOST 1d vs SOST 4d; \*\*\*\* $p \leq 0.0001$  SOST 5d vs vehicle 5d; ##### $p \leq 0.0001$  SOST 1d vs SOST 5d; two-way ANOVA followed by Tukey's post hoc test. (b) Data are mean fold change in cell number relative to 1d of SOST treated FCSCs and vehicle  $\pm$  S.D.; paired Student's t-test.

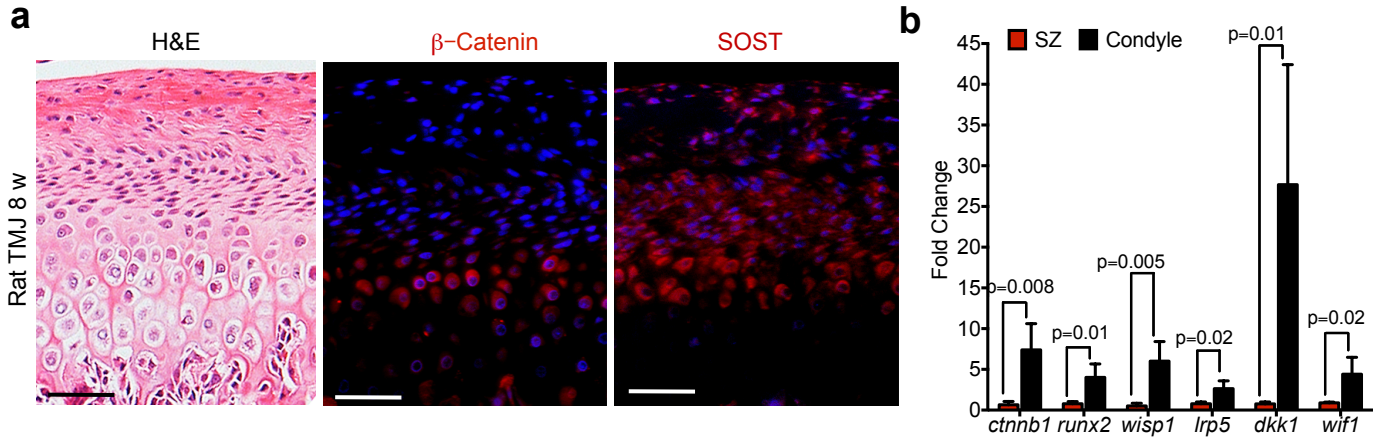

**Supplementary Figure 7: Wnt signaling is temporally and spatially regulated in TMJ**

**(a)** H&E and immunostaining for  $\beta$ Catenin (red) and sclerostin (SOST, red) in 8 week-old rat male TMJ condyle. Dapi=nucleus. Scale bar = 50  $\mu$ m. **(b)** qRT-PCR for wnt target genes (*ctnnb1*, *runx2*, *wisp1*, *lrp5*, *dkk1*, and *wif1*) using RNA extracted from SZ (red) and condyle (black) tissues. Data are normalized to GAPDH and mean fold change relative relative to SZ tissue; error bars are S.D.; n=4 rats male rats 8w; paired Student's t-test.

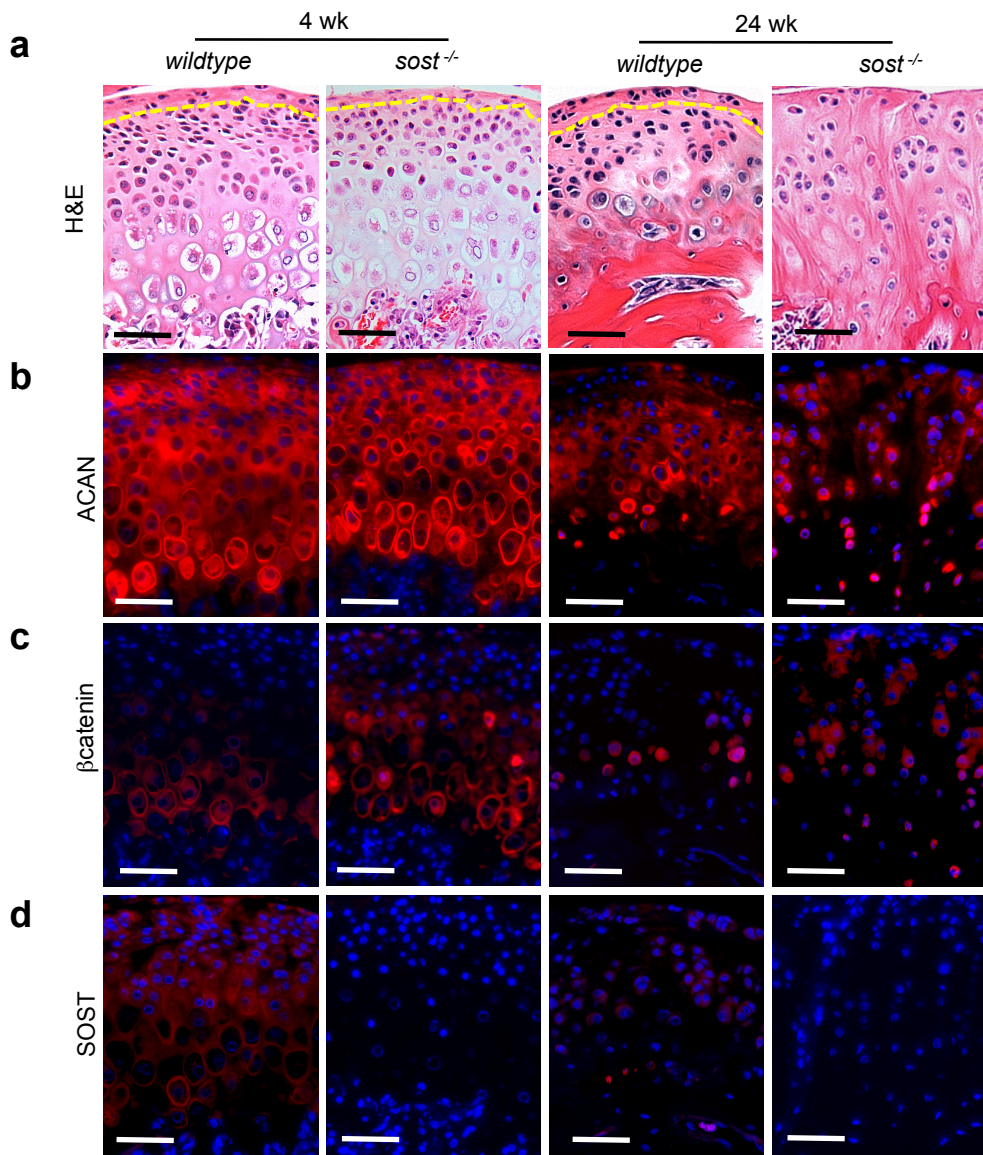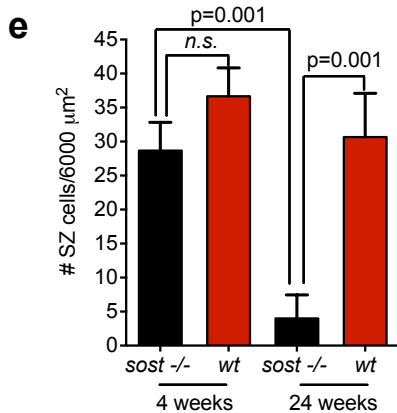

### Supplementary Figure 8: Sclerostin deficiency in mice causes loss FCSCs

Mice deficient in sclerostin show decrease FCSCs, degeneration, and abnormal  $\beta$ catenin and aggrecan distribution. Scale bar = 50  $\mu\text{m}$ . **(a)** H&E staining and immunohistochemical staining of **(b)** aggrecan (ACAN), **(c)**  $\beta$ Catenin ( $\beta$ Cat), and **(d)** sclerostin (SOST). **(e)** The number of FCSCs in SZ tissue in the comparable sagittal sections from WT and *sost*<sup>-/-</sup> mandibular condylar cartilages at 4 and 24 weeks of age. Data are mean; error bars are S.D.; n=3 *sost*<sup>-/-</sup> male mice 4 w and 24w; two-way ANOVA followed by Tukey's post hoc test.



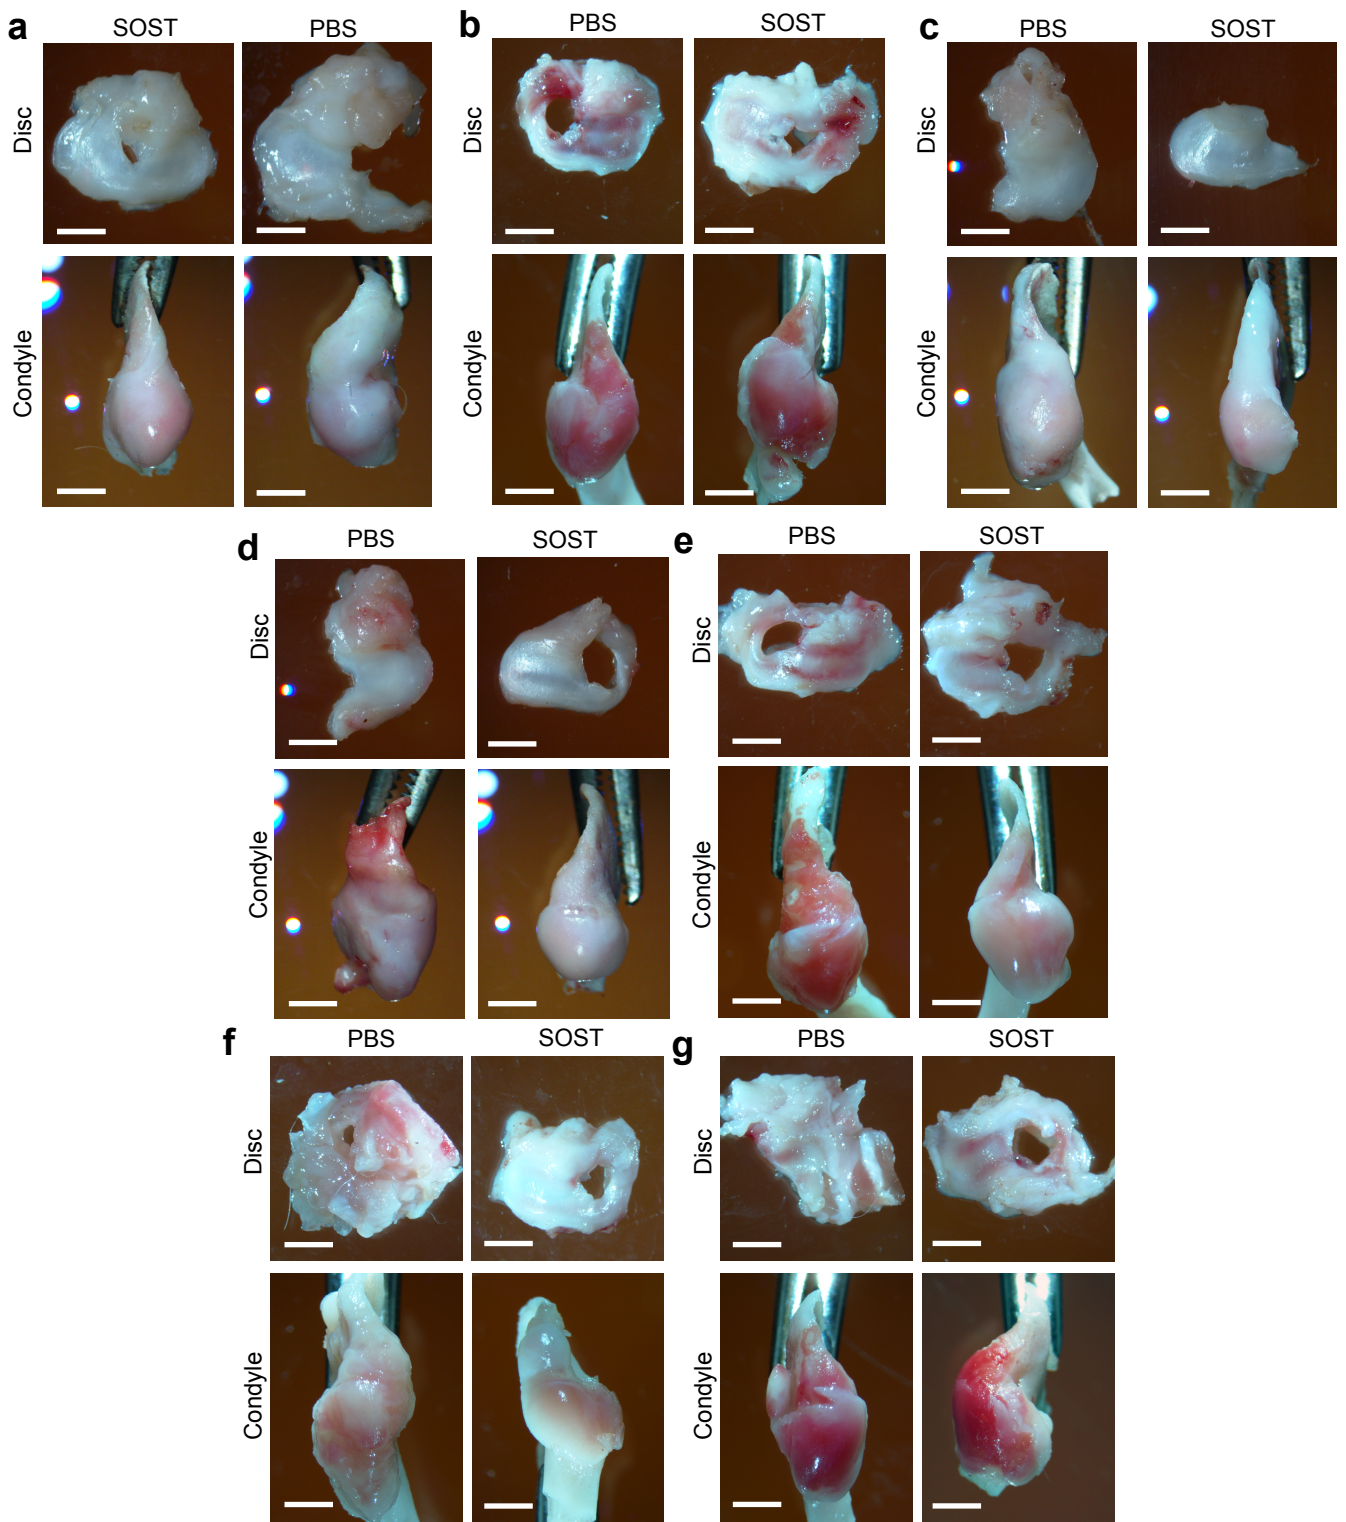

**Supplementary Figure 9: Sclerostin ameliorates TMJ degeneration in rabbits.**

(a-g) TMJ pathology was surgically induced in 12w-old male New Zealand white male rabbits and a punch biopsy was used to create a 2.5 mm perforation in the TMJ disc bilaterally. 3 days post-surgery, 0.1 ml SOST (100ng/ml in PBS) was injected into the inferior TMJ intra-articular space unilaterally on the right (a) or left (b-g) once weekly for 8 weeks. Vehicle control (PBS) was injected into the contra-lateral TMJ. Images are photographs that show the superior view of rabbit TMJ disc and condyle 8 weeks following bilateral disc perforation surgery. SOST was injected into the inferior TMJ intra-articular space unilaterally once weekly for 8 weeks, while vehicle control (PBS) was injected into the contra-lateral TMJ within the same animal. Scale bar = 3mm.

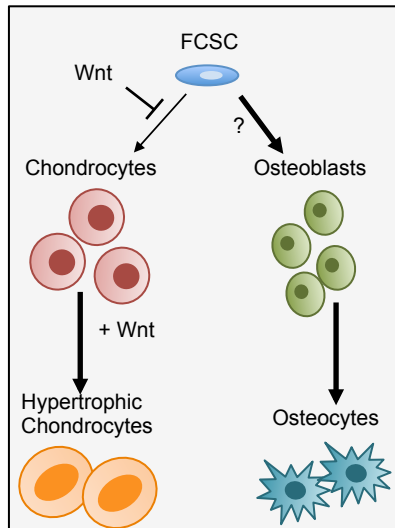

**Supplementary Figure 10: FCSC fate specification is regulated by Wnt signaling.**

A single FCSC can spontaneously commit to bone and cartilage lineages. Canonical Wnt signals inhibit FCSC differentiation into chondrocytes and promote chondrocyte terminal differentiation.

**Supplementary Table 1: Single cell clonal multi-differentiation potential analysis**

A total of 31 single cell FCSC clonal progenies were isolated and their ability to undergo adipogenesis, chondrogenesis and osteogenesis was tested *in vitro*.

---

|                                          |                      |
|------------------------------------------|----------------------|
| Total Number of Clones Isolated          | 31 Clones            |
| Tri-lineage Differentiation Potential    | 22.5% (7/31 clones)  |
| Bi-lineage Differentiation Potential     | 64.5% (20/31 clones) |
| Single Lineage Differentiation Potential | 12.9% (4/31 clones)  |

---

**Supplementary Table 2: Human TMJ fibrocartilage Analyses**

12 patient samples were obtained from NIDCR TIRR that underwent TMJ condyle fibrocartilage replacement surgery. The osteoarthritic histopathological score was graded and  $\beta$ -catenin expression was quantified.

| Research ID | Age DOS | Gender | Race    | Stage | Grade | Score | # $\beta$ catenin cells/<br>$\mu\text{m}^2 \times 10^6$ |
|-------------|---------|--------|---------|-------|-------|-------|---------------------------------------------------------|
| T06359      | 29      | F      | Asian   | 4     | 3.5   | 14    | 142.45                                                  |
| T06368      | 33      | F      | White   | 4     | 4.0   | 16    | 155.40                                                  |
| T06353      | 22      | F      | White   | 4     | 4.0   | 16    | 366.95                                                  |
| T08620      | 25      | F      | White   | 4     | 4.0   | 16    | 179.90                                                  |
| T06313      | 52      | F      | White   | 4     | 4.4   | 18    | 453.03                                                  |
| T06017      | 22      | F      | Unknown | 4     | 4.5   | 18    | 449.35                                                  |
| T07616      | 35      | F      | White   | 4     | 4.5   | 18    | 540.35                                                  |
| T06554      | 41      | F      | White   | 4     | 5.0   | 20    | 351.44                                                  |
| T09634      | 39      | M      | White   | 4     | 5.0   | 20    | 366.55                                                  |
| T07610      | 52      | F      | White   | 4     | 6.0   | 24    | 334.79                                                  |
| T06309      | 38      | M      | White   | 4     | 6.0   | 24    | 178.19                                                  |
| T06347      | 42      | F      | White   | 4     | 6.0   | 24    | 100.65                                                  |

**Supplementary Table 3: Antibodies used for immunohistochemistry and flow cytometry**

| Primary Antibody                                             | Source                        | Secondary Antibody                                              | Isotype Negative Control                          |
|--------------------------------------------------------------|-------------------------------|-----------------------------------------------------------------|---------------------------------------------------|
| Rabbit anti- <b>Aggrecan</b>                                 | Millipore AB1031 (1:100)      | Invitrogen A-11010 (1:1000) or<br>Invitrogen A-11008 (1:1000)   | Rabbit IgG<br>R&D AB-105-C                        |
| Rabbit anti- <b>Lubricin</b>                                 | Novus Biologics 19048 (1:100) | Invitrogen A-11010 (1:1000)                                     | Rabbit IgG<br>R&D AB-105-C                        |
| Mouse anti- <b>Type II Collagen</b>                          | Millipore MAB8887 (1:50)      | Invitrogen A-11003 (1:1000) or<br>Invitrogen A-11001 (1:1000)   | Mouse IgG1<br>R&D MAB002                          |
| Rabbit Anti- <b>Osteocalcin</b>                              | Millipore AB10911 (1:100)     | Invitrogen A-11010 (1:1000)                                     | Rabbit IgG<br>R&D AB-105-C                        |
| Rabbit Anti- <b>β Catenin</b><br>(for mouse, rat, and human) | Abcam AB6302 (1:50)           | Invitrogen A-11010 (1:1000, rodent)<br>(1:2500, human)          | Rabbit IgG<br>R&D AB-105-C                        |
| Mouse Anti- <b>β Catenin</b><br>(for rabbit)                 | Millipore Mab2081 (1:100)     | Invitrogen A-11001 (1:1000)                                     | Mouse IgG1<br>R&D MAB002                          |
| Rabbit Anti- <b>Sclerostin</b>                               | Abcam AB63097 (1:50)          | Invitrogen A-11010 (1:1000)                                     | Rabbit IgG<br>R&D AB-105-C                        |
| Mouse Anti- <b>CD90</b> (PE)                                 | Abcam AB33694                 | N/A                                                             | Mouse IgG1 (PE)<br>Abcam AB91357                  |
| Hamster Anti- <b>CD29</b> (Pacific Blue)                     | Biolegend 102224              | N/A                                                             | Hamster IgG<br>(Pacific Blue)<br>Biolegend 400925 |
| Mouse anti- <b>CD44</b> (PE)                                 | Abcam AB23396                 | N/A                                                             | Mouse IgG1 (PE)<br>Abcam AB91357                  |
| Mouse anti- <b>CD105</b>                                     | Novus Biologics NBP1-42383    | Novus Biologics anti<br>Mouse IgG Antibody<br>(FITC)<br>NB720-F | Mouse IgG1<br>R&D MAB002                          |
| Mouse anti- <b>CD146</b> (APC)                               | R&D<br>FAB3250A               | N/A                                                             | Mouse IgG2a<br>(APC)<br>R&D IC003A                |
| Mouse anti- <b>CD45</b> (PerCp)                              | Biolegend<br>202220           | N/A                                                             | Mouse IgG1<br>(PerCP)<br>Biolegend 400150         |
| Mouse anti- <b>CD79a</b> (APC)                               | Abcam AB188420                | N/A                                                             | Mouse IgG1 (PE)<br>Abcam AB67435                  |
| Mouse anti- <b>CD11b</b> (FITC)                              | BD Biosciences<br>554982      | N/A                                                             | Mouse IgA (FITC)<br>553478                        |

**Supplementary Table 4: Primers used for qRT-PCR**

| Gene Symbol    | Taqman Gene®<br>Expression Assay |
|----------------|----------------------------------|
| <i>gapdh</i>   | Rn01775763_g1                    |
| <i>sox6</i>    | Rn00488400_m1                    |
| <i>sox9</i>    | Rn01751069_mH                    |
| <i>acan</i>    | Rn00573424_m1                    |
| <i>col2a1</i>  | Rn01637081_g1                    |
| <i>col10a1</i> | Rn01408030_m1                    |
| <i>bgn</i>     | Rn00567229_m1                    |
| <i>fmod</i>    | Rn00589918_m1                    |
| <i>dcn</i>     | Rn01503161_m1                    |
| <i>scx</i>     | Rn01504576_m1                    |
| <i>col1a1</i>  | Rn01463848_m1                    |
| <i>prg4</i>    | Rn01490812_m1                    |
| <i>sox5</i>    | Rn01492418_m1                    |
| <i>ppar-γ</i>  | Rn00440945_m1                    |
| <i>ocn</i>     | Rn01455285_g1                    |
| <i>twist1</i>  | Rn00585470_s1                    |
| <i>ccnd1</i>   | Rn00432360_m1                    |
| <i>ctnnb1</i>  | Rn00584431_g1                    |
| <i>runx2</i>   | Rn01512298_m1                    |
| <i>wisp1</i>   | Rn01505161_m1                    |
| <i>lrp5</i>    | Rn01451428_m1                    |
| <i>dkk1</i>    | Rn01501537_m1                    |
| <i>wif1</i>    | Rn00586968_m1                    |
